# Supplementary material for: A functional peptidyl-tRNA hydrolase, ICT1, has been recruited into the human mitochondrial ribosome
Source: PubMed Central journal article supplement — EMBO J. 2010 Feb 25;29(6):1116–25. doi: 10.1038/emboj.2010.14 (PMC2845271; doi:10.1038/emboj.2010.14), 2010-02-25
Supplement: emboj201014s1.pdf [file emboj201014s1.pdf]

TABLE S1 - RICHTER ET AL.

| GENE       | UNIPROT  | PROT ID        | PROT NAME                                                                                          | Protein descriptions |           |           | Protein identification data |              |              |          |             |  | empAI abundance data |  |
|------------|----------|----------------|----------------------------------------------------------------------------------------------------|----------------------|-----------|-----------|-----------------------------|--------------|--------------|----------|-------------|--|----------------------|--|
|            |          |                |                                                                                                    | C1_PROTSCORE         | C1_NRpeps | C1_NRions | ICTL1_PROTSCORE             | ICTL1_NRpeps | ICTL1_NRions | C1_EMPAI | ICTL1_EMPAI |  |                      |  |
| ATAD3B     | Q5T9A4   | NP_114127.3    | AAA-ATPase TOB3                                                                                    | 53                   | 1         | 1         | 133                         | 4            | 4            | 0.033    | 0.139       |  |                      |  |
| ACAD9      | Q9H845   | NP_054768.2    | acyl-Coenzyme A dehydrogenase family, member 9                                                     | 8                    | 1         | 1         | 315                         | 7            | 7            | 0.036    | 0.281       |  |                      |  |
| ACADVL     | P49748   | NP_000009.1    | acyl-Coenzyme A dehydrogenase, very long chain isoform 1 precursor                                 | 102                  | 5         | 5         | 237                         | 7            | 7            | 0.153    | 0.220       |  |                      |  |
| ACOT9      |          | NP_001028755.2 | acyl-Coenzyme A thioesterase 2, mitochondrial isoform b                                            | 0                    | 0         |           | 337                         | 10           | 12           | 0.000    | 0.624       |  |                      |  |
| AP2M1      | Q96CW1   | NP_004059.2    | adaptor-related protein complex 2, mu 1 subunit isoform a                                          | 0                    | 0         |           | 31                          | 1            | 1            | 0.000    | 0.045       |  |                      |  |
| AFG3L2     | Q9Y4W6   | NP_006787.1    | AFG3 ATPase family gene 3-like 2                                                                   | 28                   | 1         | 1         | 112                         | 2            | 2            | 0.026    | 0.053       |  |                      |  |
| AARS2      | A2RRN5   | NP_065796.1    | alanyl-tRNA synthetase like                                                                        | 0                    | 0         |           | 221                         | 6            | 6            | 0.000    | 0.142       |  |                      |  |
| ALDH1L2    | Q3SY69   | NP_001029345.1 | aldehyde dehydrogenase 1 family, member L2                                                         | 0                    | 0         |           | 707                         | 17           | 19           | 0.000    | 0.415       |  |                      |  |
| ALDH1B1    | Q8WX76   | NP_000683.3    | aldehyde dehydrogenase 1B1 precursor                                                               | 8                    | 1         | 1         | 136                         | 4            | 4            | 0.044    | 0.190       |  |                      |  |
| AASS       | Q9UDR5   | NP_005754.2    | aminoadipate-semialdehyde synthase                                                                 | 0                    | 0         |           | 137                         | 4            | 4            | 0.000    | 0.100       |  |                      |  |
| RARS2      | Q96FUS   | NP_064716.1    | arginyl-tRNA synthetase-like                                                                       | 0                    | 0         |           | 28                          | 1            | 1            | 0.000    | 0.031       |  |                      |  |
| ATPSF1     | P24539   | NP_001679.2    | ATP synthase, H+ transporting, mitochondrial FO complex, subunit B1 precursor                      | 20                   | 1         | 1         | 61                          | 2            | 2            | 0.080    | 0.166       |  |                      |  |
| ATPSH      | O75947   | NP_006347.1    | ATP synthase, H+ transporting, mitochondrial FO complex, subunit d isoform a                       | 6                    | 1         | 1         | 58                          | 3            | 3            | 0.136    | 0.468       |  |                      |  |
| ATPSL      | O75964   | NP_006467.4    | ATP synthase, H+ transporting, mitochondrial FO complex, subunit G                                 | 0                    | 0         |           | 100                         | 4            | 4            | 0.000    | 0.931       |  |                      |  |
| ATPSA1     | P25705   | NP_001001937.1 | ATP synthase, H+ transporting, mitochondrial F1 complex, alpha subunit precursor                   | 486                  | 15        | 18        | 978                         | 21           | 30           | 0.995    | 2.162       |  |                      |  |
| ATPSB      | P06576   | NP_001677.2    | ATP synthase, H+ transporting, mitochondrial F1 complex, beta subunit precursor                    | 304                  | 14        | 18        | 752                         | 18           | 25           | 0.874    | 1.392       |  |                      |  |
| ATPSC1     | P36542   | NP_001001973.1 | ATP synthase, H+ transporting, mitochondrial F1 complex, gamma subunit isoform L (liver) precursor | 45                   | 1         | 1         | 205                         | 4            | 5            | 0.083    | 0.487       |  |                      |  |
| ATAD3A     | Q8N275   | NP_060658.2    | ATPase family, AAA domain containing 3A                                                            | 115                  | 3         | 3         | 273                         | 8            | 8            | 0.104    | 0.301       |  |                      |  |
| ABCB7      | O75027-2 | NP_004290.2    | ATP-binding cassette, sub-family B, member 7                                                       | 0                    | 0         |           | 24                          | 1            | 1            | 0.000    | 0.032       |  |                      |  |
| PGAM5      | Q96HS1-2 | NP_612642.1    | Bcl-XL-binding protein v68                                                                         | 41                   | 1         | 1         | 278                         | 9            | 11           | 0.066    | 1.021       |  |                      |  |
| CPT2       | P23786   | NP_000089.1    | carnitine palmitoyltransferase II                                                                  | 0                    | 0         |           | 43                          | 1            | 1            | 0.000    | 0.031       |  |                      |  |
| CECR5      | Q9BXW7-2 | NP_060299.4    | cat eye syndrome chromosome region, candidate 5 isoform 1                                          | 0                    | 0         |           | 181                         | 5            | 7            | 0.000    | 0.546       |  |                      |  |
| NDUFA13    |          | NP_057049.3    | cell death-regulatory protein GRIM19                                                               | 0                    | 0         |           | 137                         | 5            | 5            | 0.000    | 0.417       |  |                      |  |
| CABC1      | Q8NI60   | NP_064632.2    | chaperone, ABC1 activity of bc1 complex like precursor                                             | 0                    | 0         |           | 93                          | 2            | 2            | 0.000    | 0.086       |  |                      |  |
| HSPD1      | P10809   | NP_955472.1    | chaperonin                                                                                         | 709                  | 24        | 34        | 1513                        | 34           | 58           | 2.275    | 6.565       |  |                      |  |
| C3orf60    | Q9BU61   | NP_951032.1    | chromosome 3 open reading frame 60 isoform a                                                       | 0                    | 0         |           | 205                         | 5            | 5            | 0.000    | 1.154       |  |                      |  |
| GTPBP10    | A4D1E9   | NP_149098.2    | claudin 12 isoform 2                                                                               | 0                    | 0         |           | 399                         | 10           | 11           | 0.000    | 0.598       |  |                      |  |
| CLPX       | O76031   | NP_006651.2    | ClpX caseinolytic protease X homolog                                                               | 0                    | 0         |           | 60                          | 2            | 2            | 0.000    | 0.059       |  |                      |  |
| MMAB       | Q96EY8   | NP_443077.1    | cob(I)alamin adenosyltransferase precursor                                                         | 0                    | 0         |           | 152                         | 3            | 3            | 0.000    | 0.318       |  |                      |  |
| CCDC109A   | Q8NE86   | NP_612366.1    | coiled-coil domain containing 109A                                                                 | 0                    | 0         |           | 61                          | 3            | 3            | 0.000    | 0.218       |  |                      |  |
| CHCHD1     | Q96BP2   | NP_976043.1    | coiled-coil-helix-coiled-coil-helix domain containing 1                                            | 8                    | 1         | 1         | 140                         | 3            | 4            | 0.259    | 1.512       |  |                      |  |
| C1QBP      | Q07021   | NP_001203.1    | complement component 1, q subcomponent binding protein precursor                                   | 33                   | 2         | 2         | 378                         | 8            | 11           | 0.194    | 1.649       |  |                      |  |
| COX2       | P00403   | NP_536846.1    | cytochrome c oxidase subunit II                                                                    | 40                   | 3         | 3         | 170                         | 4            | 8            | 0.501    | 1.955       |  |                      |  |
| COX4I1     | P13073   | NP_001852.1    | cytochrome c oxidase subunit IV isoform 1 precursor                                                | 0                    | 0         |           | 176                         | 7            | 8            | 0.000    | 1.310       |  |                      |  |
| DDX28      | Q9NUL7   | NP_060850.1    | DEAD (Asp-Glu-Ala-Asp) box polypeptide 28                                                          | 8                    | 1         | 1         | 723                         | 16           | 20           | 0.038    | 1.127       |  |                      |  |
| DHX30      | Q7L2E3   | NP_619520.1    | DEAH (Asp-Glu-Ala-His) box polypeptide 30 isoform 1                                                | 248                  | 8         | 9         | 1349                        | 37           | 51           | 0.145    | 1.154       |  |                      |  |
| DHX30      | Q7L2E3-2 | NP_619519.1    | DEAH (Asp-Glu-Ala-His) box polypeptide 30 isoform 3                                                | 0                    | 0         |           | 365                         | 8            | 11           | 0.000    | 0.714       |  |                      |  |
| DAP3       | P51398   | NP_387506.1    | death-associated protein 3                                                                         | 190                  | 7         | 7         | 568                         | 12           | 20           | 0.389    | 1.560       |  |                      |  |
| DBT        | Q5VVL8   | NP_001909.2    | dihydroipoamide branched chain transacylase precursor                                              | 8                    | 1         | 1         | 191                         | 5            | 9            | 0.042    | 0.448       |  |                      |  |
| DLD        | B2R5X0   | NP_000099.2    | dihydroipoamide dehydrogenase precursor                                                            | 68                   | 2         | 2         | 316                         | 8            | 11           | 0.096    | 0.660       |  |                      |  |
| POLDIP2    | Q9Y2S7   | NP_056399.1    | DNA polymerase delta interacting protein 2                                                         | 0                    | 0         |           | 127                         | 3            | 3            | 0.000    | 0.170       |  |                      |  |
| TOP1       | P11387   | NP_003277.1    | DNA topoisomerase I                                                                                | 0                    | 0         |           | 9                           | 1            | 1            | 0.000    | 0.034       |  |                      |  |
| DNAJ3      | Q96EY1   | NP_005138.2    | DnaJ (Hsp40) homolog, subfamily A, member 3                                                        | 0                    | 0         |           | 113                         | 4            | 5            | 0.000    | 0.248       |  |                      |  |
| DCI        | P42126   | NP_001910.2    | dodecenoyl-Coenzyme A delta isomerase precursor                                                    | 0                    | 0         |           | 72                          | 1            | 1            | 0.000    | 0.086       |  |                      |  |
| ETFA       | P13804   | NP_000117.1    | electron transfer flavoprotein, alpha polypeptide                                                  | 0                    | 0         |           | 54                          | 3            | 3            | 0.000    | 0.194       |  |                      |  |
| ERAL1      | O75616   | NP_005693.1    | Era G-protein-like 1                                                                               | 0                    | 0         |           | 189                         | 4            | 4            | 0.000    | 0.194       |  |                      |  |
| FASTKD1    | Q8TEA9   | NP_078898.2    | FAST kinase domains 1                                                                              | 0                    | 0         |           | 105                         | 3            | 3            | 0.000    | 0.074       |  |                      |  |
| FASTKD2    | Q9NYY8   | NP_055744.2    | FAST kinase domains 2                                                                              | 0                    | 0         |           | 584                         | 12           | 14           | 0.000    | 0.409       |  |                      |  |
| FLAD1      | Q8NFF5   | NP_079483.3    | flavin adenine dinucleotide synthetase isoform 1                                                   | 0                    | 0         |           | 25                          | 1            | 1            | 0.000    | 0.034       |  |                      |  |
| GLUD1      | P00367   | NP_005262.1    | glutamate dehydrogenase 1                                                                          | 50                   | 4         | 4         | 302                         | 8            | 8            | 0.143    | 0.306       |  |                      |  |
| GLDC       | Q2M2F8   | NP_000161.2    | glycine dehydrogenase (decarboxylating)                                                            | 0                    | 0         |           | 104                         | 4            | 4            | 0.000    | 0.090       |  |                      |  |
| GRSF1      | Q12849-2 | NP_002083.2    | G-rich RNA sequence binding factor 1                                                               | 0                    | 0         |           | 333                         | 10           | 14           | 0.000    | 0.817       |  |                      |  |
| GADD45GIP1 | Q8TAE8   | NP_443082.2    | growth arrest and DNA-damage-inducible, gamma interacting protein 1                                | 12                   | 2         | 2         | 340                         | 8            | 16           | 0.194    | 3.125       |  |                      |  |
| GRPEL1     | Q9HAV7   | NP_079472.1    | GrpE-like 1, mitochondrial                                                                         | 97                   | 3         | 3         | 212                         | 6            | 9            | 0.318    | 1.291       |  |                      |  |
| MTG1       | Q9BT17   | NP_612393.2    | GTP-binding protein                                                                                | 0                    | 0         |           | 159                         | 6            | 7            | 0.000    | 0.431       |  |                      |  |
| HSPA1A     | P08107   | NP_005336.2    | heat shock 70kDa protein 1A                                                                        | 0                    | 0         |           | 62                          | 2            | 2            | 0.000    | 0.067       |  |                      |  |
| HSPA9      | P38646   | NP_004125.3    | heat shock 70kDa protein 9B precursor                                                              | 626                  | 16        | 24        | 1450                        | 31           | 59           | 0.962    | 4.242       |  |                      |  |
| HNRPDL     | O14979   | NP_112740.1    | heterogeneous nuclear ribonucleoprotein D-like                                                     | 0                    | 0         |           | 18                          | 1            | 1            | 0.000    | 0.061       |  |                      |  |
| HK1        | P19367   | NP_000179.1    | hexokinase 1 isoform HK1                                                                           | 0                    | 0         |           | 35                          | 2            | 2            | 0.000    | 0.048       |  |                      |  |
| HARS2      | P49590   | NP_036340.1    | histidyl-tRNA synthetase-like                                                                      | 0                    | 0         |           | 123                         | 4            | 4            | 0.000    | 0.169       |  |                      |  |
| HSD17B10   | Q99714   | NP_004484.1    | hydroxysteroid (17-beta) dehydrogenase 10 isoform 1                                                | 216                  | 7         | 7         | 630                         | 11           | 21           | 0.711    | 4.012       |  |                      |  |
| C7orf30    | Q96EH3   | NP_612455.1    | hypothetical protein LOC115416                                                                     | 0                    | 0         |           | 185                         | 4            | 5            | 0.000    | 0.450       |  |                      |  |
| C18orf55   | Q9P010   | NP_054896.1    | hypothetical protein LOC29090                                                                      | 0                    | 0         |           | 11                          | 1            | 1            | 0.000    | 0.086       |  |                      |  |
| C6orf203   | Q9POP8   | NP_057571.1    | hypothetical protein LOC51250                                                                      | 0                    | 0         |           | 170                         | 4            | 5            | 0.000    | 0.616       |  |                      |  |

|          |          |                |                                                               |      |    |     |      |    |     |       |        |
|----------|----------|----------------|---------------------------------------------------------------|------|----|-----|------|----|-----|-------|--------|
| C17orf42 | Q6PJ19   | NP_078959.2    | hypothetical protein LOC79736                                 | 0    | 0  |     | 116  | 3  | 4   | 0.000 | 0.407  |
| C18orf22 | Q9H776   | NP_079081.1    | hypothetical protein LOC79863                                 | 0    | 0  |     | 58   | 4  | 4   | 0.000 | 0.274  |
| C4orf14  | Q8NC60   | NP_115689.1    | hypothetical protein LOC84273                                 | 2    | 1  | 1   | 451  | 12 | 13  | 0.027 | 0.422  |
| KIAA0391 | Q8N5L5   | NP_055487.2    | hypothetical protein LOC9692                                  | 0    | 0  |     | 52   | 1  | 1   | 0.000 | 0.036  |
| ICT1     | Q14197   | NP_001536.1    | immature colon carcinoma transcript 1                         | 71   | 2  | 2   | 709  | 16 | 33  | 0.222 | 26.213 |
| IMMT     |          | NP_006830.1    | inner membrane protein, mitochondrial                         | 53   | 1  | 1   | 146  | 5  | 5   | 0.026 | 0.138  |
| IGF2BP2  | Q9Y6M1   | NP_001007226.1 | insulin-like growth factor 2 mRNA binding protein 2 isoform b | 0    | 0  |     | 29   | 1  | 1   | 0.000 | 0.044  |
| LETM1    | O95202   | NP_036450.1    | leucine zipper-EF-hand containing transmembrane protein 1     | 6    | 1  | 1   | 86   | 2  | 2   | 0.027 | 0.056  |
| LRPPRC   | P42704   | NP_573566.2    | leucine-rich PPR motif-containing protein                     | 2934 | 75 | 134 | 4009 | 80 | 148 | 4.398 | 5.438  |
| KARS     | Q15046   | NP_005539.1    | lysyl-tRNA synthetase                                         | 14   | 1  | 1   | 107  | 4  | 4   | 0.037 | 0.157  |
| ME2      | P23368   | NP_002387.1    | malic enzyme 2, NAD(+)-dependent, mitochondrial               | 0    | 0  |     | 64   | 3  | 3   | 0.000 | 0.109  |
| NGRN     |          | NP_001028260.2 | mesenchymal stem cell protein DSC92 isoform 2                 | 0    | 0  |     | 189  | 5  | 6   | 0.000 | 0.484  |
| MCC2     | Q9HCCO   | NP_071415.1    | methylcrotonoyl-Coenzyme A carboxylase 2 (beta)               | 36   | 1  | 1   | 215  | 6  | 7   | 0.040 | 0.314  |
| MUT      | P22033   | NP_000246.1    | methylmalonyl Coenzyme A mutase precursor                     | 9    | 1  | 1   | 119  | 4  | 4   | 0.029 | 0.122  |
| METT11D1 | Q9H7H0   | NP_073571.1    | methyltransferase 11 domain containing 1 isoform 2            | 0    | 0  |     | 322  | 6  | 8   | 0.000 | 0.456  |
| ALDH2    | P05091   | NP_000681.2    | mitochondrial aldehyde dehydrogenase 2 precursor              | 0    | 0  |     | 395  | 11 | 13  | 0.000 | 0.759  |
| POLRMT   | O00411   | NP_005026.3    | mitochondrial DNA-directed RNA polymerase precursor           | 44   | 1  | 1   | 1022 | 25 | 33  | 0.016 | 0.701  |
| LONP1    | P36776   | NP_004784.2    | mitochondrial lon peptidase 1                                 | 94   | 3  | 3   | 482  | 12 | 14  | 0.077 | 0.414  |
| MCAT     | Q8IVS2   | NP_775738.3    | mitochondrial malonyltransferase isoform a precursor          | 0    | 0  |     | 196  | 4  | 4   | 0.000 | 0.239  |
| PMPCB    | O75439   | NP_004270.2    | mitochondrial processing peptidase beta subunit precursor     | 0    | 0  |     | 187  | 4  | 5   | 0.000 | 0.238  |
| MRPL1    | Q9BYD6   | NP_064621.2    | mitochondrial ribosomal protein L1                            | 35   | 2  | 2   | 731  | 16 | 23  | 0.166 | 4.843  |
| MRPL10   | Q7Z7H8   | NP_660298.2    | mitochondrial ribosomal protein L10 isoform a                 | 0    | 0  |     | 317  | 7  | 15  | 0.000 | 2.433  |
| MRPL11   | Q9Y3B7   | NP_057134.1    | mitochondrial ribosomal protein L11 isoform a                 | 23   | 2  | 2   | 598  | 16 | 23  | 0.245 | 11.452 |
| MRPL12   | P52815   | NP_002940.2    | mitochondrial ribosomal protein L12                           | 78   | 3  | 5   | 326  | 7  | 16  | 0.730 | 4.780  |
| MRPL13   | Q9BYD1   | NP_054797.2    | mitochondrial ribosomal protein L13                           | 54   | 4  | 4   | 384  | 9  | 15  | 0.425 | 2.775  |
| MRPL14   | Q6P1L8   | NP_115487.2    | mitochondrial ribosomal protein L14                           | 85   | 3  | 3   | 253  | 4  | 9   | 0.438 | 1.976  |
| MRPL15   | Q9P015   | NP_054894.1    | mitochondrial ribosomal protein L15                           | 169  | 5  | 5   | 889  | 19 | 39  | 0.403 | 13.030 |
| MRPL16   | Q9NX20   | NP_060310.1    | mitochondrial ribosomal protein L16                           | 0    | 0  |     | 274  | 10 | 14  | 0.000 | 3.642  |
| MRPL17   | Q9NRX2   | NP_071344.1    | mitochondrial ribosomal protein L17                           | 33   | 2  | 2   | 381  | 10 | 18  | 0.274 | 7.859  |
| MRPL18   | Q9H0U6   | NP_054880.2    | mitochondrial ribosomal protein L18                           | 24   | 1  | 1   | 271  | 7  | 11  | 0.110 | 2.162  |
| MRPL19   | P49406   | NP_055578.2    | mitochondrial ribosomal protein L19                           | 0    | 0  |     | 569  | 15 | 26  | 0.000 | 4.043  |
| MRPL2    | Q5T653   | NP_057034.2    | mitochondrial ribosomal protein L2                            | 0    | 0  |     | 444  | 11 | 18  | 0.000 | 3.924  |
| MRPL21   | A6NKU0   | NP_852615.1    | mitochondrial ribosomal protein L21 isoform d                 | 12   | 1  | 1   | 497  | 11 | 19  | 0.093 | 4.380  |
| MRPL22   | Q9NWU5   | NP_054899.2    | mitochondrial ribosomal protein L22 isoform a                 | 60   | 3  | 3   | 414  | 11 | 18  | 0.334 | 4.623  |
| MRPL23   |          | NP_066957.2    | mitochondrial ribosomal protein L23                           | 100  | 3  | 3   | 251  | 6  | 11  | 0.468 | 3.084  |
| MRPL24   | Q96A35   | NP_663781.1    | mitochondrial ribosomal protein L24                           | 0    | 0  |     | 401  | 10 | 23  | 0.000 | 5.629  |
| MRPL27   | Q9P0M9   | NP_057588.1    | mitochondrial ribosomal protein L27 isoform a                 | 23   | 1  | 1   | 137  | 3  | 4   | 0.166 | 0.848  |
| MRPL28   | Q13084   | NP_006419.2    | mitochondrial ribosomal protein L28                           | 0    | 0  |     | 659  | 17 | 27  | 0.000 | 9.926  |
| MRPL3    | P09001   | NP_009139.1    | mitochondrial ribosomal protein L3                            | 34   | 1  | 1   | 375  | 9  | 15  | 0.058 | 1.322  |
| MRPL32   | Q9BYC8   | NP_114109.1    | mitochondrial ribosomal protein L32                           | 34   | 1  | 1   | 160  | 3  | 5   | 0.136 | 0.896  |
| MRPL37   | Q9BZE1   | NP_057575.2    | mitochondrial ribosomal protein L37                           | 57   | 3  | 3   | 785  | 16 | 27  | 0.142 | 2.305  |
| MRPL38   | B2R894   | NP_115867.1    | mitochondrial ribosomal protein L38                           | 52   | 2  | 3   | 500  | 15 | 20  | 0.241 | 3.217  |
| MRPL39   | Q9NYK5-2 | NP_542984.2    | mitochondrial ribosomal protein L39 isoform b                 | 38   | 4  | 4   | 653  | 17 | 27  | 0.252 | 3.556  |
| MRPL4    | Q9BYD3   | NP_057040.2    | mitochondrial ribosomal protein L4 isoform a                  | 57   | 4  | 4   | 558  | 11 | 25  | 0.311 | 4.436  |
| MRPL40   | Q9NQ50   | NP_003767.2    | mitochondrial ribosomal protein L40                           | 16   | 1  | 1   | 215  | 5  | 11  | 0.110 | 2.162  |
| MRPL41   | Q8IXM3   | NP_115866.1    | mitochondrial ribosomal protein L41                           | 47   | 4  | 4   | 157  | 4  | 9   | 0.931 | 3.394  |
| MRPL43   | Q8N983-4 | NP_115488.2    | mitochondrial ribosomal protein L43 isoform a                 | 142  | 4  | 4   | 401  | 8  | 17  | 0.551 | 5.449  |
| MRPL43   | Q8N983   | NP_789762.1    | mitochondrial ribosomal protein L43 isoform b                 | 142  | 4  | 4   | 373  | 8  | 16  | 0.551 | 4.780  |
| MRPL44   | Q9H9J2   | NP_075066.1    | mitochondrial ribosomal protein L44                           | 78   | 3  | 3   | 626  | 15 | 24  | 0.212 | 3.642  |
| MRPL45   |          | NP_115727.3    | mitochondrial ribosomal protein L45                           | 11   | 1  | 1   | 480  | 16 | 22  | 0.064 | 2.932  |
| MRPL46   | Q9H2W6   | NP_071446.2    | mitochondrial ribosomal protein L46                           | 0    | 0  |     | 378  | 10 | 15  | 0.000 | 1.683  |
| MRPL47   | Q9HD33   | NP_065142.2    | mitochondrial ribosomal protein L47 isoform a                 | 49   | 2  | 2   | 509  | 13 | 21  | 0.233 | 8.006  |
| MRPL48   | Q96GC5   | NP_057139.1    | mitochondrial ribosomal protein L48                           | 45   | 2  | 3   | 266  | 4  | 10  | 0.468 | 2.594  |
| MRPL49   | Q13405   | NP_004918.1    | mitochondrial ribosomal protein L49                           | 61   | 2  | 2   | 409  | 7  | 14  | 0.233 | 3.329  |
| MRPL50   | Q8N5N7   | NP_061924.1    | mitochondrial ribosomal protein L50                           | 14   | 1  | 1   | 247  | 8  | 11  | 0.110 | 2.162  |
| MRPL51   | Q4U2R6   | NP_057581.2    | mitochondrial ribosomal protein L51                           | 0    | 0  |     | 166  | 6  | 10  | 0.000 | 5.813  |
| MRPL54   | Q6P161   | NP_758455.1    | mitochondrial ribosomal protein L54                           | 0    | 0  |     | 117  | 3  | 6   | 0.000 | 1.894  |
| MRPL55   | Q7Z7F7   | NP_852130.1    | mitochondrial ribosomal protein L55 isoform a                 | 0    | 0  |     | 224  | 5  | 12  | 0.000 | 7.377  |
| MRPL9    | Q9BYD2   | NP_113608.1    | mitochondrial ribosomal protein L9                            | 43   | 3  | 3   | 512  | 11 | 18  | 0.269 | 3.175  |
| MRPS10   | P82664   | NP_060611.2    | mitochondrial ribosomal protein S10                           | 36   | 2  | 3   | 304  | 8  | 11  | 0.280 | 1.471  |
| MRPS11   | P82912   | NP_073750.2    | mitochondrial ribosomal protein S11 isoform a                 | 0    | 0  |     | 172  | 4  | 4   | 0.000 | 0.624  |
| MRPS14   | O60783   | NP_071383.1    | mitochondrial ribosomal protein S14                           | 78   | 3  | 4   | 129  | 3  | 6   | 1.154 | 2.162  |
| MRPS15   | P82914   | NP_112570.2    | mitochondrial ribosomal protein S15                           | 27   | 2  | 3   | 130  | 4  | 4   | 0.334 | 0.468  |
| MRPS16   | Q9Y3D3   | NP_057149.1    | mitochondrial ribosomal protein S16                           | 37   | 2  | 2   | 161  | 6  | 9   | 0.311 | 2.384  |
| MRPS17   | Q9Y2R5   | NP_057053.1    | mitochondrial ribosomal protein S17                           | 31   | 2  | 2   | 232  | 5  | 7   | 0.585 | 4.012  |
| MRPS18A  | Q9NV52   | NP_060605.1    | mitochondrial ribosomal protein S18A                          | 18   | 1  | 1   | 220  | 6  | 10  | 0.110 | 1.848  |
| MRPS18B  | Q9Y676   | NP_054765.1    | mitochondrial ribosomal protein S18B                          | 0    | 0  |     | 261  | 8  | 8   | 0.000 | 1.031  |

|           |        |                |                                                                                   |     |    |    |      |    |    |       |        |
|-----------|--------|----------------|-----------------------------------------------------------------------------------|-----|----|----|------|----|----|-------|--------|
| MRPS2     | Q9Y399 | NP_057118.1    | mitochondrial ribosomal protein S2                                                | 0   | 0  |    | 408  | 11 | 15 | 0.000 | 1.943  |
| MRPS21    | P82921 | NP_061870.1    | mitochondrial ribosomal protein S21                                               | 0   | 0  |    | 218  | 4  | 10 | 0.000 | 16.783 |
| MRPS22    | P82650 | NP_064576.1    | mitochondrial ribosomal protein S22                                               | 250 | 10 | 13 | 795  | 18 | 35 | 0.917 | 4.766  |
| MRPS23    | Q9Y3D9 | NP_057154.2    | mitochondrial ribosomal protein S23                                               | 122 | 4  | 4  | 350  | 8  | 9  | 0.445 | 1.291  |
| MRPS24    | Q96EL2 | NP_114403.1    | mitochondrial ribosomal protein S24                                               | 10  | 1  | 1  | 137  | 3  | 4  | 0.105 | 0.492  |
| MRPS25    | P82663 | NP_071942.1    | mitochondrial ribosomal protein S25                                               | 60  | 5  | 6  | 321  | 9  | 14 | 0.995 | 4.012  |
| MRPS26    | Q9BYN8 | NP_110438.1    | mitochondrial ribosomal protein S26                                               | 84  | 4  | 6  | 425  | 8  | 16 | 1.254 | 7.733  |
| MRPS27    | Q92552 | NP_055899.1    | mitochondrial ribosomal protein S27                                               | 126 | 7  | 7  | 795  | 17 | 23 | 0.363 | 1.769  |
| MRPS28    | Q9Y2Q9 | NP_054737.1    | mitochondrial ribosomal protein S28                                               | 109 | 3  | 4  | 392  | 6  | 10 | 0.492 | 1.721  |
| MRPS30    | Q9NP92 | NP_057724.2    | mitochondrial ribosomal protein S30                                               | 5   | 1  | 1  | 537  | 11 | 21 | 0.051 | 1.861  |
| MRPS31    |        | NP_005821.1    | mitochondrial ribosomal protein S31                                               | 99  | 4  | 5  | 841  | 17 | 27 | 0.334 | 3.732  |
| MRPS34    | P82930 | NP_076425.1    | mitochondrial ribosomal protein S34                                               | 14  | 1  | 1  | 388  | 12 | 15 | 0.101 | 3.217  |
| MRPS35    | P82673 | NP_068593.2    | mitochondrial ribosomal protein S35                                               | 115 | 7  | 8  | 449  | 10 | 21 | 0.693 | 2.981  |
| MRPS5     | P82675 | NP_114108.1    | mitochondrial ribosomal protein S5                                                | 0   | 0  |    | 436  | 12 | 19 | 0.000 | 1.537  |
| MRPS6     | P82932 | NP_115865.1    | mitochondrial ribosomal protein S6                                                | 41  | 3  | 4  | 236  | 9  | 11 | 0.931 | 5.105  |
| MRPS7     | Q9Y2R9 | NP_057055.1    | mitochondrial ribosomal protein S7                                                | 71  | 4  | 5  | 383  | 10 | 20 | 0.532 | 4.505  |
| MRPS9     | P82933 | NP_872578.1    | mitochondrial ribosomal protein S9                                                | 37  | 2  | 3  | 850  | 20 | 38 | 0.158 | 5.434  |
| MRRF      | Q96E11 | NP_620132.1    | mitochondrial ribosome recycling factor isoform 1                                 | 0   | 0  |    | 274  | 4  | 6  | 0.000 | 0.638  |
| MRM1      | Q6IN84 | NP_079140.2    | mitochondrial rRNA methyltransferase 1 homolog                                    | 8   | 1  | 1  | 83   | 2  | 2  | 0.070 | 0.145  |
| MTERF     | Q99551 | NP_008911.1    | mitochondrial transcription termination factor precursor                          | 0   | 0  |    | 140  | 4  | 4  | 0.000 | 0.198  |
| MTIF2     |        | NP_002444.2    | mitochondrial translational initiation factor 2 precursor                         | 0   | 0  |    | 52   | 2  | 2  | 0.000 | 0.080  |
| HADHA     | P40939 | NP_000173.2    | mitochondrial trifunctional protein, alpha subunit precursor                      | 126 | 6  | 6  | 610  | 17 | 21 | 0.164 | 0.701  |
| MOV10     | Q9HCE1 | NP_066014.1    | Mov10, Moloney leukemia virus 10, homolog                                         | 0   | 0  |    | 54   | 3  | 3  | 0.000 | 0.061  |
| MTERFD1   | Q96E29 | NP_057026.3    | MTERF domain containing 1                                                         | 0   | 0  |    | 370  | 10 | 13 | 0.000 | 1.006  |
| MTERFD2   |        | NP_872307.2    | MTERF domain containing 2                                                         | 0   | 0  |    | 333  | 9  | 9  | 0.000 | 0.619  |
| AGK       | Q53H12 | NP_060708.1    | multiple substrate lipid kinase                                                   | 29  | 1  | 1  | 117  | 3  | 3  | 0.050 | 0.158  |
| NDUFA9    | Q16795 | NP_004993.1    | NADH dehydrogenase (ubiquinone) 1 alpha subcomplex, 9, 39kDa                      | 0   | 0  |    | 110  | 3  | 3  | 0.000 | 0.134  |
| NDUFS1    | P28331 | NP_004997.4    | NADH dehydrogenase (ubiquinone) Fe-S protein 1, 75kDa precursor                   | 0   | 0  |    | 534  | 10 | 13 | 0.000 | 0.422  |
| NDUFS2    | Q75306 | NP_004541.1    | NADH dehydrogenase (ubiquinone) Fe-S protein 2, 49kDa (NADH-coenzyme Q reductase) | 0   | 0  |    | 104  | 4  | 4  | 0.000 | 0.190  |
| NDUFS3    | Q75489 | NP_004542.1    | NADH dehydrogenase (ubiquinone) Fe-S protein 3, 30kDa (NADH-coenzyme Q reductase) | 44  | 3  | 3  | 231  | 7  | 7  | 0.259 | 0.711  |
| NDUFS8    | O00217 | NP_002487.1    | NADH dehydrogenase (ubiquinone) Fe-S protein 8, 23kDa (NADH-coenzyme Q reductase) | 13  | 1  | 1  | 67   | 2  | 2  | 0.096 | 0.202  |
| NDUHV1    | P49821 | NP_009034.2    | NADH dehydrogenase (ubiquinone) flavoprotein 1, 51kDa                             | 0   | 0  |    | 205  | 5  | 5  | 0.000 | 0.265  |
| NIPSNAP1  |        | NP_003625.1    | nipsnap homolog 1                                                                 | 31  | 1  | 1  | 61   | 2  | 3  | 0.075 | 0.241  |
| NSUN4     | Q96CB9 | NP_950245.2    | NOL1/NOP2/Sun domain family 4 protein                                             | 0   | 0  |    | 185  | 5  | 6  | 0.000 | 0.540  |
| NME4      | O00746 | NP_005000.1    | nucleoside-diphosphate kinase 4                                                   | 0   | 0  |    | 173  | 7  | 10 | 0.000 | 1.994  |
| OAT       | P04181 | NP_000265.1    | ornithine aminotransferase precursor                                              | 204 | 6  | 6  | 408  | 10 | 12 | 0.326 | 0.758  |
| OXA1L     |        | NP_005006.1    | oxidase (cytochrome c) assembly 1-like                                            | 0   | 0  |    | 52   | 2  | 2  | 0.000 | 0.133  |
| PAPD1     | Q9HA74 | NP_060579.2    | PAP associated domain containing 1                                                | 0   | 0  |    | 192  | 8  | 8  | 0.000 | 0.306  |
| PTCD1     | Q75127 | NP_056360.2    | pentatricopeptide repeat domain 1                                                 | 0   | 0  |    | 606  | 14 | 16 | 0.000 | 0.668  |
| PTCD3     | Q96EY7 | NP_060422.4    | Pentatricopeptide repeat domain 3                                                 | 134 | 6  | 7  | 1049 | 23 | 46 | 0.251 | 3.354  |
| PMPCA     | Q10713 | NP_055975.1    | peptidase (mitochondrial processing) alpha                                        | 3   | 1  | 1  | 170  | 6  | 7  | 0.038 | 0.302  |
| PRDX5     | P30044 | NP_036226.1    | peroxiredoxin 5 precursor, isoform a                                              | 11  | 1  | 1  | 152  | 4  | 5  | 0.093 | 0.557  |
| ECH1      | Q13011 | NP_001389.2    | peroxisomal enoyl-coenzyme A hydratase-like protein                               | 0   | 0  |    | 156  | 3  | 4  | 0.000 | 0.266  |
| FARS2     | Q95363 | NP_006558.1    | phenylalanine-tRNA synthetase 2                                                   | 0   | 0  |    | 80   | 2  | 2  | 0.000 | 0.094  |
| PNPT1     | Q8TCS8 | NP_149100.1    | polyribonucleotide nucleotidyltransferase 1                                       | 92  | 3  | 3  | 301  | 6  | 8  | 0.083 | 0.236  |
| LOC642393 | Q9BYC9 | XP_001125910.1 | PREDICTED: similar to mitochondrial ribosomal protein L20                         | 0   | 0  |    | 301  | 8  | 9  | 0.000 | 3.394  |
| PGAM5     |        | XP_001126125.1 | PREDICTED: similar to phosphoglycerate mutase family member 5                     | 41  | 1  | 1  | 209  | 7  | 9  | 0.043 | 0.458  |
| LOC648605 |        | XP_944686.1    | PREDICTED: similar to Trimethyllysine dioxygenase, mitochondrial precursor        | 0   | 0  |    | 117  | 4  | 4  | 0.000 | 0.233  |
| LOC729317 | A6NLE7 | XP_001133585.1 | PREDICTED: similar to voltage-dependent anion channel 2                           | 20  | 2  | 2  | 197  | 5  | 5  | 0.150 | 0.417  |
| AIFM1     | Q95831 | NP_004199.1    | programmed cell death 8 isoform 1                                                 | 0   | 0  |    | 29   | 1  | 1  | 0.000 | 0.032  |
| PHB       | P35232 | NP_002625.1    | prohibitin                                                                        | 0   | 0  |    | 313  | 9  | 10 | 0.000 | 0.896  |
| PHB2      | Q99623 | NP_009204.1    | prohibitin 2                                                                      | 166 | 5  | 6  | 284  | 9  | 13 | 0.369 | 0.974  |
| PARS2     | Q7L3T8 | NP_689481.2    | prolyl-tRNA synthetase (mitochondrial)(putative)                                  | 0   | 0  |    | 22   | 1  | 1  | 0.000 | 0.043  |
| PCCB      | P05166 | NP_000523.2    | propionyl Coenzyme A carboxylase, beta polypeptide                                | 0   | 0  |    | 153  | 5  | 5  | 0.000 | 0.204  |
| PUS1      | Q9Y606 | NP_079491.2    | pseudouridylylase synthase 1 isoform 1                                            | 0   | 0  |    | 86   | 3  | 3  | 0.000 | 0.122  |
| PUSL1     | Q8NOZ8 | NP_699170.1    | pseudouridylylase synthase-like 1                                                 | 0   | 0  |    | 135  | 5  | 5  | 0.000 | 0.403  |
| PYCR2     | Q96C36 | NP_037460.2    | pyrroline-5-carboxylate reductase family, member 2                                | 0   | 0  |    | 222  | 6  | 8  | 0.000 | 0.887  |
| ALDH18A1  | P54886 | NP_002851.2    | pyrroline-5-carboxylate synthetase isoform 1                                      | 47  | 2  | 2  | 397  | 11 | 14 | 0.047 | 0.380  |
| PKD3      | Q15120 | NP_005382.1    | pyruvate dehydrogenase kinase, isoenzyme 3                                        | 0   | 0  |    | 72   | 2  | 2  | 0.000 | 0.091  |
| RG9MTD1   | Q9NRG5 | NP_060289.2    | RNA (guanine-9-) methyltransferase domain containing 1                            | 15  | 1  | 1  | 318  | 8  | 9  | 0.045 | 0.490  |
| RNMTL1    | Q9HC36 | NP_060616.1    | RNA methyltransferase like 1                                                      | 0   | 0  |    | 409  | 12 | 19 | 0.000 | 2.621  |
| RPUSD3    | Q6P087 | NP_775930.1    | RNA pseudouridylylase synthase domain containing 3                                | 0   | 0  |    | 138  | 5  | 5  | 0.000 | 0.334  |
| RPUSD4    | Q96K56 | NP_116184.1    | RNA pseudouridylylase synthase domain containing 4                                | 0   | 0  |    | 117  | 3  | 3  | 0.000 | 0.174  |
| SHMT2     | P34897 | NP_005403.2    | serine hydroxymethyltransferase 2 (mitochondrial)                                 | 30  | 1  | 1  | 327  | 7  | 8  | 0.038 | 0.346  |
| SARS2     | Q9NP81 | NP_060297.1    | seryl-tRNA synthetase 2                                                           | 0   | 0  |    | 416  | 11 | 12 | 0.000 | 0.540  |
| SFXN1     | Q9H9B4 | NP_073591.2    | sideroflexin 1                                                                    | 18  | 1  | 1  | 247  | 5  | 6  | 0.061 | 0.425  |
| SSBP1     | Q04837 | NP_003134.1    | single-stranded DNA binding protein 1                                             | 52  | 4  | 4  | 493  | 10 | 21 | 0.668 | 13.678 |

|           |          |                |                                                                                             |     |    |    |     |    |    |       |       |
|-----------|----------|----------------|---------------------------------------------------------------------------------------------|-----|----|----|-----|----|----|-------|-------|
| SLC25A18  | Q9H1K4   | NP_113669.1    | solute carrier                                                                              | 0   | 0  |    | 16  | 1  | 1  | 0.000 | 0.064 |
| SLC25A12  | O75746   | NP_003696.2    | solute carrier family 25 (mitochondrial carrier, Aralar), member 12                         | 0   | 0  |    | 101 | 3  | 3  | 0.000 | 0.093 |
| SLC25A4   | P12235   | NP_001142.2    | solute carrier family 25 (mitochondrial carrier; adenine nucleotide translocator), member 4 | 0   | 0  |    | 203 | 6  | 6  | 0.000 | 0.468 |
| SLC25A1   | P53007   | NP_005975.1    | solute carrier family 25 (mitochondrial carrier; citrate transporter), member 1             | 0   | 0  |    | 144 | 5  | 6  | 0.000 | 0.540 |
| SLC25A10  | Q9UBX3   | NP_036272.2    | solute carrier family 25 (mitochondrial carrier; dicarboxylate transporter), member 10      | 0   | 0  |    | 29  | 2  | 2  | 0.000 | 0.160 |
| SLC25A11  | Q02978   | NP_003553.2    | solute carrier family 25 (mitochondrial carrier; oxoglutarate carrier), member 11           | 0   | 0  |    | 141 | 4  | 4  | 0.000 | 0.301 |
| SLC25A3   | Q00325-2 | NP_002626.1    | solute carrier family 25 member 3 isoform b precursor                                       | 25  | 1  | 1  | 185 | 5  | 5  | 0.066 | 0.377 |
| SLC25A13  | Q9UJ50   | NP_055066.1    | solute carrier family 25, member 13 (citrin)                                                | 0   | 0  |    | 166 | 6  | 7  | 0.000 | 0.240 |
| SLC25A5   | P05141   | NP_001143.1    | solute carrier family 25, member 5                                                          | 30  | 1  | 1  | 249 | 9  | 9  | 0.066 | 0.778 |
| SLC25A6   |          | NP_001627.1    | solute carrier family 25, member A6                                                         | 0   | 0  |    | 327 | 9  | 9  | 0.000 | 0.751 |
| ERLIN2    | O94905   | NP_009106.1    | SPFH domain family, member 2 isoform 1                                                      | 0   | 0  |    | 93  | 2  | 2  | 0.000 | 0.133 |
| C14orf156 | Q9GZT3   | NP_112487.1    | SRA stem-loop-interacting RNA-binding protein                                               | 61  | 2  | 2  | 221 | 4  | 10 | 0.425 | 4.878 |
| STOML2    | Q9UJZ1   | NP_038470.1    | stomatin (EPB72)-like 2                                                                     | 26  | 2  | 2  | 250 | 5  | 6  | 0.129 | 0.438 |
| SDHA      |          | NP_004159.1    | succinate dehydrogenase complex, subunit A, flavoprotein precursor                          | 33  | 1  | 1  | 175 | 4  | 5  | 0.034 | 0.182 |
| SUCLA2    | Q9P2R7   | NP_003841.1    | succinate-CoA ligase, ADP-forming, beta subunit                                             | 0   | 0  |    | 16  | 1  | 1  | 0.000 | 0.050 |
| SDPV3L1   | Q8IYB8   | NP_003162.2    | suppressor of var1, 3-like 1                                                                | 0   | 0  |    | 119 | 4  | 5  | 0.000 | 0.153 |
| PRDX4     | Q13162   | NP_006397.1    | thioredoxin peroxidase                                                                      | 0   | 0  |    | 58  | 2  | 2  | 0.000 | 0.136 |
| THNSL1    |          | NP_079114.2    | threonine synthase-like 1                                                                   | 3   | 1  | 1  | 551 | 9  | 14 | 0.028 | 0.475 |
| TARS2     | Q9BW92   | NP_079426.2    | threonyl-tRNA synthetase-like 1                                                             | 0   | 0  |    | 348 | 8  | 9  | 0.000 | 0.247 |
| TFAM      | Q00059   | NP_003192.1    | transcription factor A, mitochondrial                                                       | 74  | 3  | 3  | 187 | 6  | 6  | 0.304 | 0.701 |
| TFB1M     | Q9Y384   | NP_057104.1    | transcription factor B1, mitochondrial                                                      | 0   | 0  |    | 290 | 9  | 13 | 0.000 | 1.075 |
| TRUB2     | O95900   | NP_056494.1    | TruB pseudouridine (psi) synthase homolog 2                                                 | 0   | 0  |    | 371 | 9  | 9  | 0.000 | 0.751 |
| TUFM      |          | NP_003312.3    | Tu translation elongation factor, mitochondrial                                             | 327 | 11 | 14 | 683 | 17 | 24 | 0.727 | 1.551 |
| C10orf2   | Q96RR1   | NP_068602.2    | twinkle                                                                                     | 0   | 0  |    | 76  | 3  | 3  | 0.000 | 0.091 |
| YARS2     | Q9Y2Z4   | NP_001035526.1 | tyrosyl-tRNA synthetase 2 (mitochondrial)                                                   | 0   | 0  |    | 460 | 11 | 12 | 0.000 | 0.684 |
| UQCRC1    | P31930   | NP_003356.2    | ubiquinol-cytochrome c reductase core protein I                                             | 0   | 0  |    | 188 | 5  | 7  | 0.000 | 0.380 |
| UQCRC2    | P22695   | NP_003357.2    | ubiquinol-cytochrome c reductase core protein II                                            | 20  | 1  | 1  | 363 | 8  | 11 | 0.055 | 0.802 |
| ISCA1     | Q9BUE6   | NP_112202.2    | ubiquinol-cytochrome c reductase core protein II                                            | 0   | 0  |    | 166 | 3  | 4  | 0.000 | 0.778 |
| UQCRCF51  | A8K519   | NP_005994.1    | ubiquinol-cytochrome c reductase, Rieske iron-sulfur polypeptide 1                          | 0   | 0  |    | 188 | 4  | 5  | 0.000 | 0.509 |
| VARS2     | Q5ST30   | NP_065175.3    | valyl-tRNA synthetase 2-like                                                                | 0   | 0  |    | 111 | 4  | 4  | 0.000 | 0.085 |
| VDAC1     | P21796   | NP_003365.1    | voltage-dependent anion channel 1                                                           | 83  | 3  | 3  | 375 | 10 | 10 | 0.218 | 0.931 |
| VDAC3     | Q9Y277   | NP_005653.3    | voltage-dependent anion channel 3                                                           | 0   | 0  |    | 136 | 3  | 3  | 0.000 | 0.241 |
| WBSCR16   | Q96151   | NP_110425.1    | Williams-Beuren syndrome chromosome region 16                                               | 0   | 0  |    | 152 | 6  | 7  | 0.000 | 0.431 |
| YME1L1    | Q96TA2   | NP_647473.1    | YME1-like 1 isoform 1                                                                       | 0   | 0  |    | 54  | 2  | 2  | 0.000 | 0.049 |

Column: Description:

GENE Gene name

UNIPROT Uniprot identifier (if available)

PROT ID refseq protein identifier

PROT NA Refseq protein name / description

C1\_PROT: Cumulative peptide identification score for the negative control sample

C1\_NRpej Total number of unique peptide sequences identified for each protein in the negative control sample

C1\_NRIor Total number of unique precursor matches for each protein in the negative control sample

ICTL1\_PR Cumulative peptide identification score for the ICT1 IP sample

ICTL1\_NR Total number of unique peptide sequences identified for each protein in the ICT1 IP sample

ICTL1\_NRI Total number of unique precursor matches for each protein in the ICT1 IP sample

C1\_EMPA Estimate of protein abundance for negative control sample\*

ICTL1\_EM Estimate of protein abundance for ICT1 IP sample\*

\* about emPAI: in 2005 Ishihama et al (Molecular & Cellular Proteomics 4:1265-1272, 2005) showed that emPAI can be used to obtain an estimate of protein abundance. It was already known that respective protein abundance roughly corresponded to the number of matched spectra. However, since tryptic cleavage of proteins yields different number of detectable peptides for each protein (depending on protein sequence length and physicochemical properties of the generated peptides) it was necessary to calculate a Protein Abundance Index (PAI) that takes these factors into account. Protein abundance expressed as PAI (or emPAI) can thus be used to compare protein abundance between samples and different proteins thanks to this correction.

PAI is calculate as: Nobserved / Ntheoretical

Where Nobserved is the number of unique precursor identification from all peptides of an identified protein and Ntheoretical is the total number of theoretically detectable peptides for that protein

Ishihama et al further improved this PAI method by exponential modification (exponentially modified protein abundance index: emPAI) that showed better linear relationship between PAI and protein abundance. Since the initial emPAI publication this method has been accepted as a label-free quantitation method and is up till now (15 Jan 2010) referenced by 222 manuscripts

Table S2 – Richter et al.

| Mitoribosomal proteins identified as co-purifying components of the ICT1 immunoprecipitation                                                                                                                                                                                                                                                                                   |                                                                                                                                                                                                                               |
|--------------------------------------------------------------------------------------------------------------------------------------------------------------------------------------------------------------------------------------------------------------------------------------------------------------------------------------------------------------------------------|-------------------------------------------------------------------------------------------------------------------------------------------------------------------------------------------------------------------------------|
| Large Subunit (39S)                                                                                                                                                                                                                                                                                                                                                            | Small Subunit (28S)                                                                                                                                                                                                           |
| MRPL1, MRPL2,<br>MRPL3, MRPL4,<br>MRPL9, MRPL10,<br>MRPL11, MRPL12,<br>MRPL13, MRPL14,<br>MRPL15, MRPL16,<br>MRPL17, MRPL18,<br>MRPL19, MRPL21,<br>MRPL22, MRPL23,<br>MRPL24, MRPL27,<br>MRPL28, MRPL32,<br>MRPL37, MRPL38,<br>MRPL39, MRPL40,<br>MRPL41, MRPL43-a,<br>MRPL43-b, MRPL44,<br>MRPL45, MRPL46,<br>MRPL47, MRPL48,<br>MRPL49, MRPL50,<br>MRPL51, MRPL54,<br>MRPL55 | MRPS2, MRPS5,<br>MRPS6, MRPS7,<br>MRPS9, MRPS10,<br>MRPS11, MRPS18A<br>MRPS18B, MRPS21,<br>MRPS22, MRPS23,<br>MRPS24, MRPS25,<br>MRPS26, MRPS27,<br>MRPS28,<br>MRPS29/DAP3,<br>MRPS30, MRPS31,<br>MRPS34, MRPS35,<br>METT11D1 |
| <b>39 MRPL of 50</b>                                                                                                                                                                                                                                                                                                                                                           | <b>23 MRPS of 31</b>                                                                                                                                                                                                          |

Proteomic analysis employing LCMSMS identified the tabulated mitoribosomal proteins as co-precipitants with ICT1. Analysis was performed as described in the Supplemental Experimental Procedures.

Supplemental data – Richter et al.

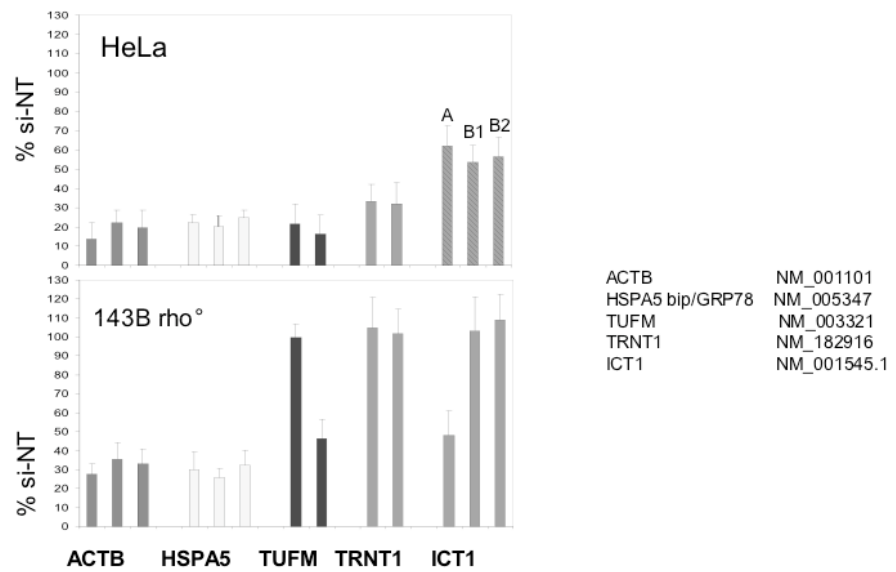

Supp Fig 1 si-ICT1B does not affect the growth of rho0 cells.

Equal numbers (~5000) of HeLa or 143B.206 rho0 cells were grown in DMEM supplemented with 50  $\mu\text{g}\cdot\text{ml}^{-1}$  uridine in independent wells of a 96 well plate and exposed to 3 different siRNAs designed against the indicated transcripts or to the non-targeting control. After 3 days, medium was aspirated and 200  $\mu\text{l}$  per well of 0.5 mg/ml MTT in DMEM medium was added. Plates were incubated for 3 h at 37 °C, MTT solution removed and 200  $\mu\text{l}$  DMSO added to dissolve formazan crystals and incubation at 37 °C for 5 min. Absorbance was measured at 550 nm in a microplate reader (Bio-Tek). In two cases, (TUFM and TRNT1) no affect on growth of either cell line was noted for one siRNA and consequently data is not shown. All siRNAs were assayed from quadruplicate wells in one plate except for si-ICTB, where quadruplicates were performed in two independent plates (B1 and B2). Results are shown normalised to the growth of cells treated with the non-targeting siRNA from which the mean absorbance was taken. Transcripts were designed against the REFSEQ accession numbers given.

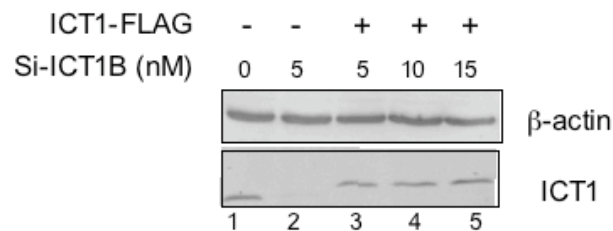

Supp Fig 2 Standard curve of si-ICT1B.

To determine the concentration of si-ICT1B that caused depletion of endogenous ICT1 and which resulted in similar steady state levels of inducibly expressed ICT1 to natural endogenous levels, lysates were produced from HEK293T cells uninduced (lane 1, 2) or after 3 days expression of ICT1-Flag (lanes 3-6, 1  $\mu\text{g}\cdot\text{ml}^{-1}$  tet as inducer) in the presence of no (lane 1) or varying concs of si-ICT1B (5 - 30 nM, lanes 2-6). Anti-ICT1 and anti- $\beta$ -actin antibodies are used.
